# Supplementary material for: Cation Crosslinking-Induced Stable Copper Nanoclusters Powder as Latent Fingerprints Marker
Source: MDPI journal article supplement (doi:10.3390/nano11123371), 2021-12-12
Supplement: s1 [file s1]

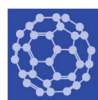

## Supplementary Materials

# Cation Crosslinking-Induced Stable Copper Nanoclusters Powder as Latent Fingerprints Marker

Yi Qiu <sup>1</sup>, Zhuoqi Wen <sup>2</sup>, Shiliang Mei <sup>1</sup>, Jinxin Wei <sup>1</sup>, Yuanyuan Chen <sup>1</sup>, Zhe Hu <sup>1</sup>, Zhongjie Cui <sup>1</sup>, Wanlu Zhang <sup>1</sup>, Fengxian Xie <sup>1</sup> and Ruiqian Guo <sup>1,2,3,4,\*</sup>

<sup>1</sup> Institute for Electric Light Sources, School of Information Science and Technology, Fudan University, Shanghai 200433, China; 19210720021@fudan.edu.cn (Y.Q.); meishiliang@fudan.edu.cn (S.M.); 20210720024@fudan.edu.cn (J.W.); 19210720022@fudan.edu.cn (Y.C.); 20110720020@fudan.edu.cn (Z.H.); 19110720020@fudan.edu.cn (Z.C.); fdwlzhang@fudan.edu.cn (W.Z.); xiefengxian@fudan.edu.cn (F.X.)

<sup>2</sup> Institute of Future Lighting, Academy for Engineering and Technology, Fudan University, Shanghai 200433, China; 19110860003@fudan.edu.cn

<sup>3</sup> Zhongshan-Fudan Joint Innovation Center, Zhongshan 528437, China

<sup>4</sup> Yiwu Research Institute of Fudan University, Chengbei Road, Yiwu City, Zhejiang, 322000, China

\* Correspondence: rguo@fudan.edu.cn

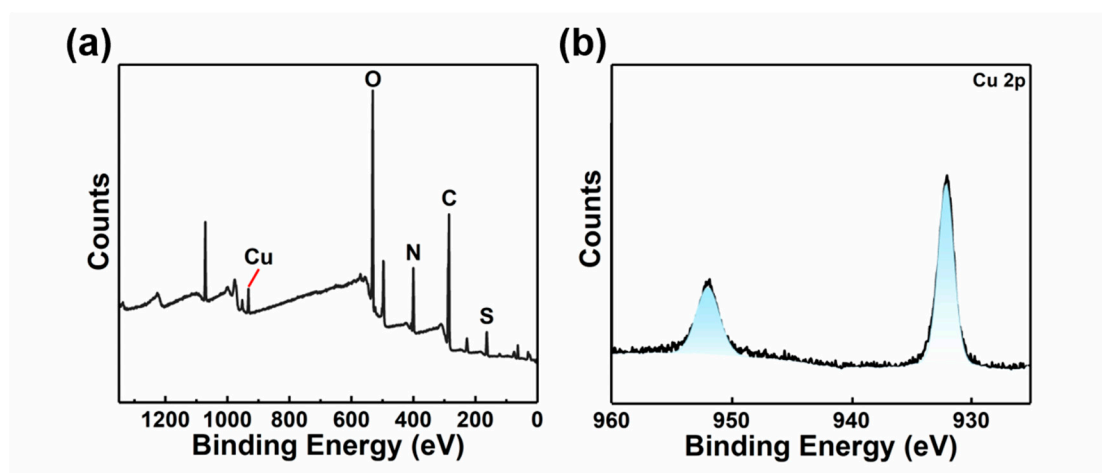

Figure S1. (a) XPS survey of GSH-Cu NCs; (b) XPS spectrum of Cu 2p electrons in GSH-Cu NCs.

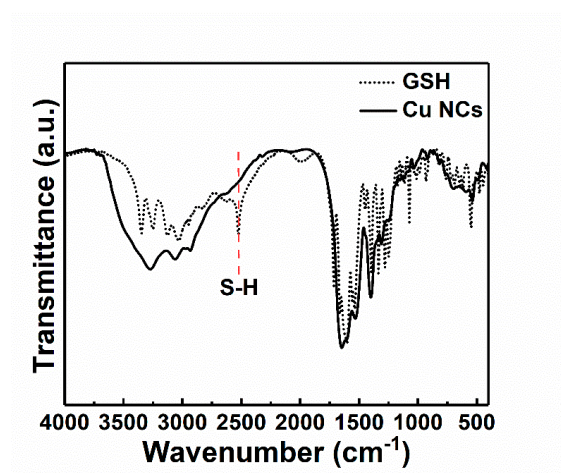

Figure S2. FTIR spectrum of GSH and Cu NCs.

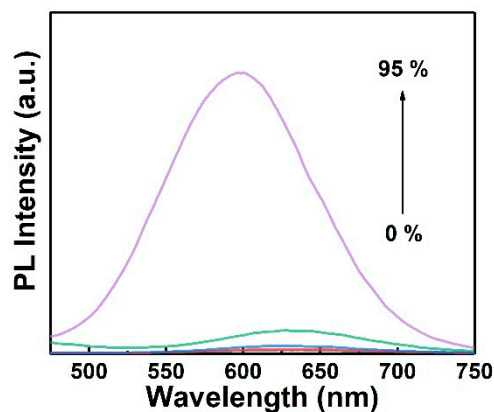

**Figure S3.** Emission spectrum of Cu NCs with different concentration of IPA (from 0 to 95 %) under the excitation of 365 nm.

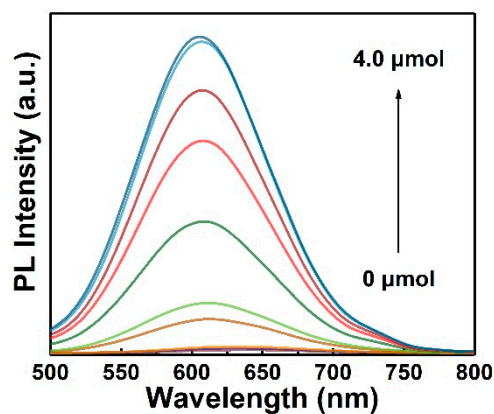

**Figure S4.** Emission spectrum of Cu NCs with different amount of Ce<sup>3+</sup> (from 0 to 4.0 μmol) under the excitation of 365 nm.

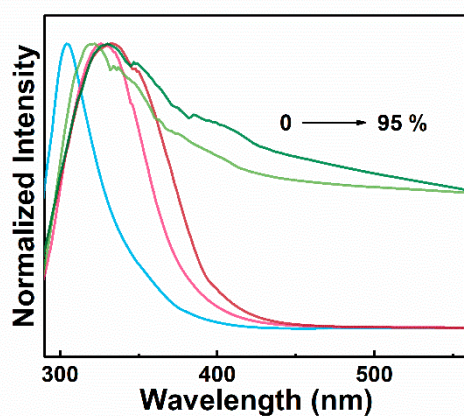

**Figure S5.** Absorption spectrum of Cu NCs with different concentration of IPA (from 0 to 95 %).

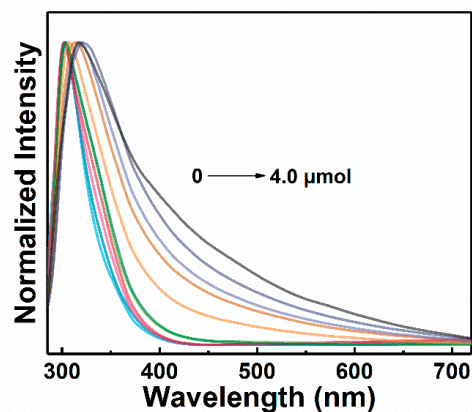

Figure S6. Absorption spectrum of Cu NCs with different amount of  $\text{Ce}^{3+}$  (from 0 to 4.0  $\mu\text{mol}$ ).

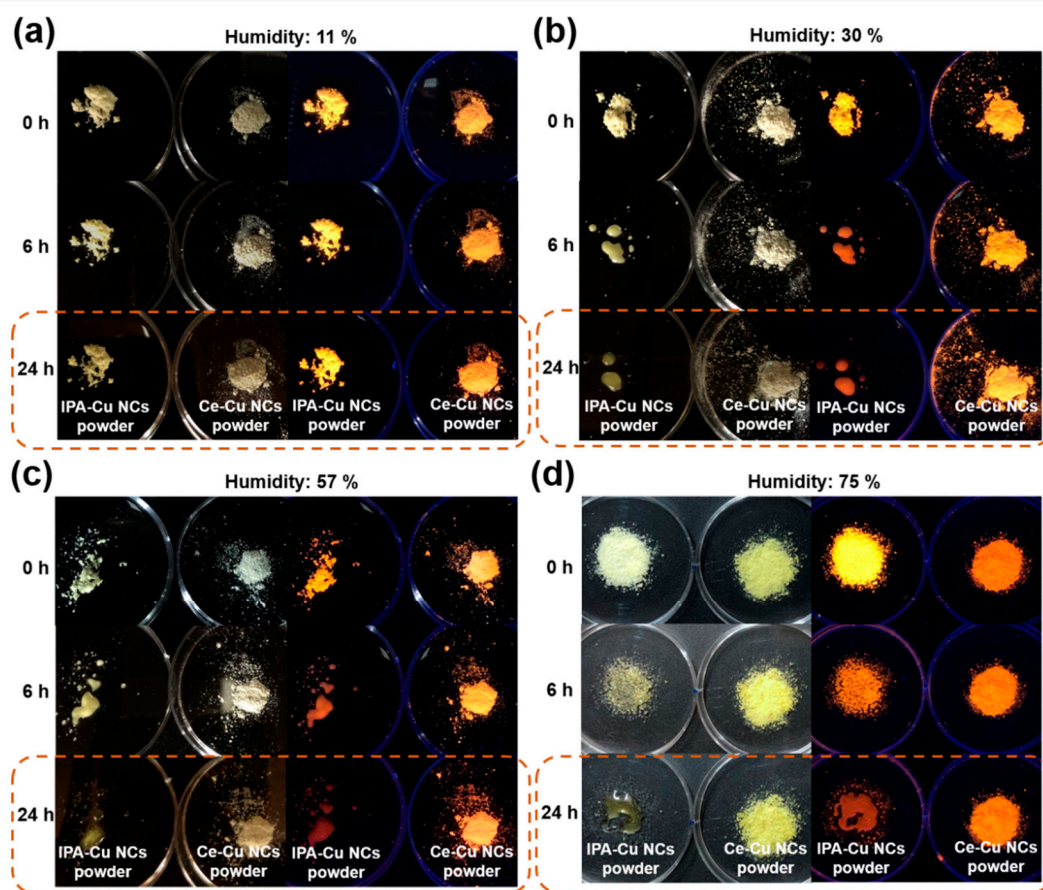

Figure S7. Photographs of IPA-Cu NCs powder and Ce-Cu NCs powder after different time (0, 6 and 24 h) in the same store condition (temperature of 25 °C) under daylight and under UV light under different ambient humidity: (a) 11 %, (b) 30 %, (c) 57 % and (d) 75 %.

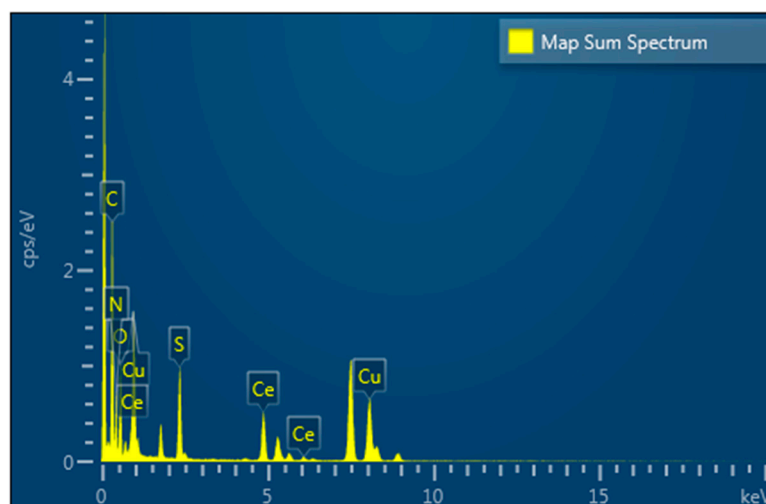

Figure S8. Map sum spectrum of Ce-Cu NCs aggregates.

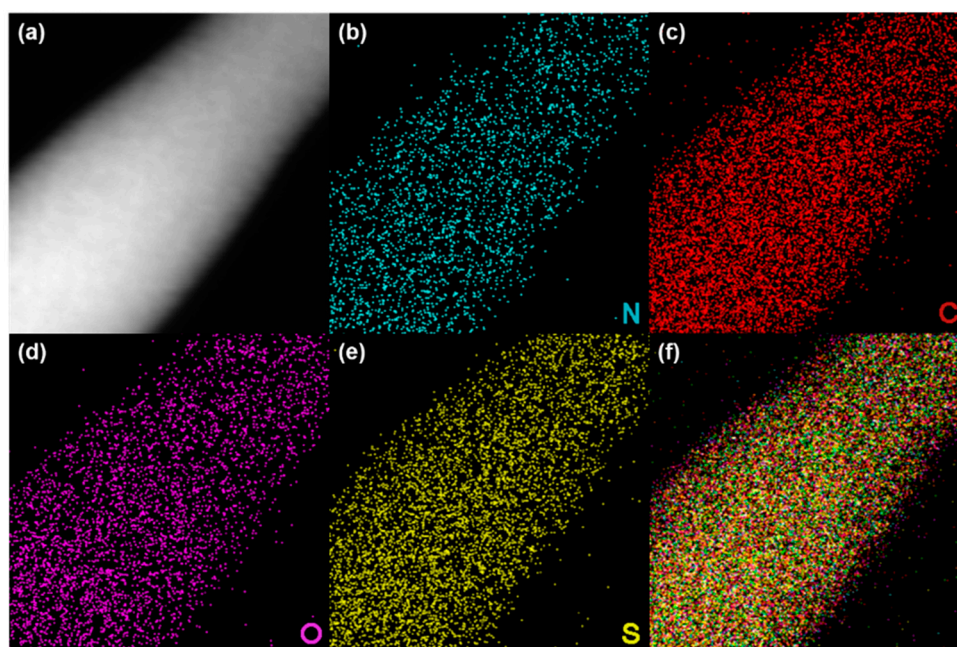

Figure S9. (a) HAADF-STEM image of Ce-Cu NCs aggregates; EDS elemental mapping of (b) C, (c) N, (d) O, (e) S and (f) overlapped EDS images of Ce-Cu NCs aggregates.

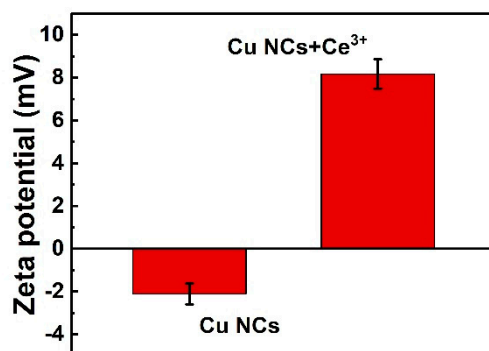

Figure S10. Zeta potential of Cu NCs and Ce-Cu NCs aggregates.



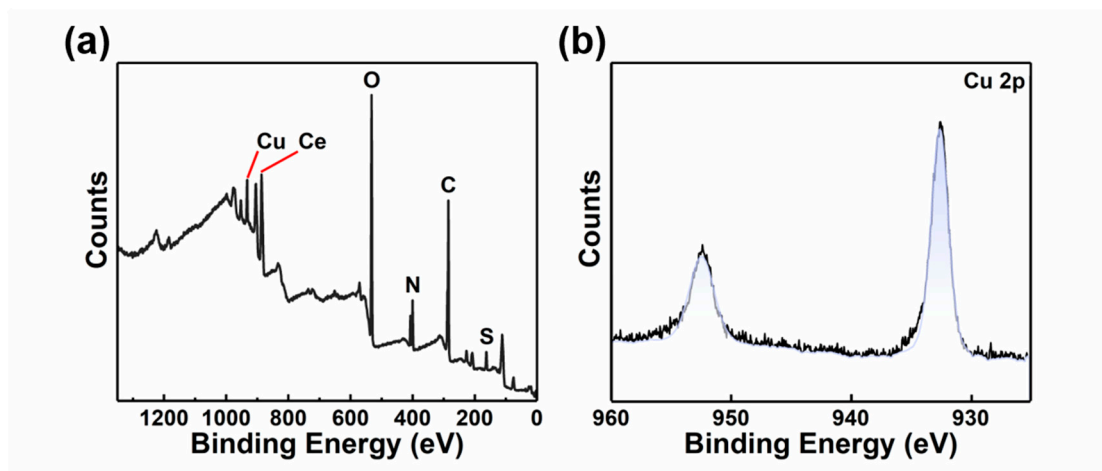

**Figure S11.** (a) XPS survey of Ce-Cu NCs aggregates; (b) XPS spectrum of Cu 2p electrons in Ce-Cu NCs aggregates.

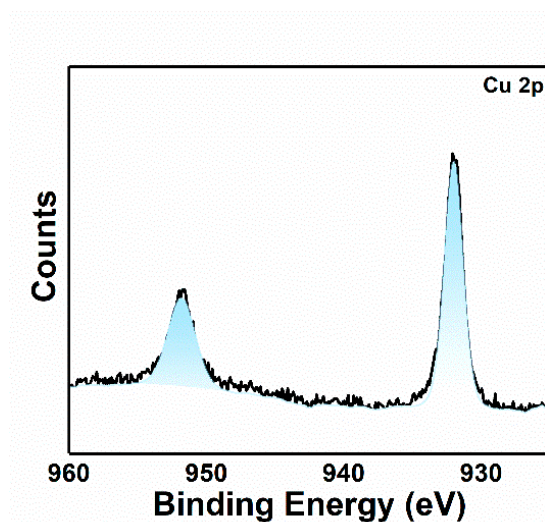

**Figure S12.** XPS spectrum of Cu 2p electrons in Ce-Cu NCs aggregates stored for 3 days.

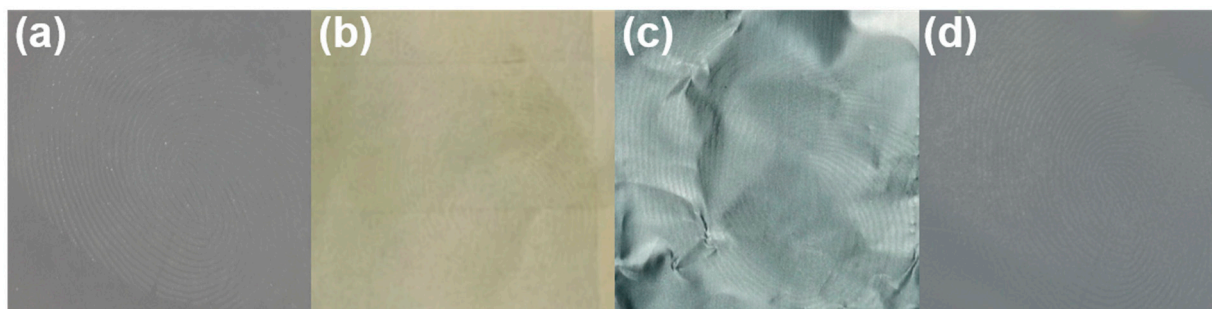

**Figure S13.** Photos under daylight of latent fingerprints on (a) glass, (b) paper, (c) foil, and (d) plastic.

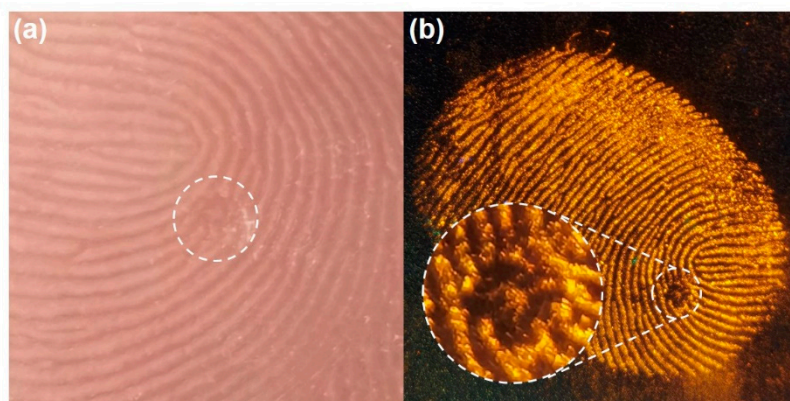

**Figure S14.** (a) Photo of finger of the donor under daylight; (b) photo of latent fingerprints detection using Ce-Cu NCs powder under UV light. Inset in (b) showed the scar of the donor's finger.
